# Supplementary material for: Implementation of a mock root cause analysis to provide simulated patient safety training
Source: PubMed Central journal article supplement — BMJ Open Qual. 2017 Oct 31;6(2):e000096. doi: 10.1136/bmjoq-2017-000096 (PMC5699135; doi:10.1136/bmjoq-2017-000096), 2017-10-31
Supplement: bmjoq-2017-000096supp002.pdf [file bmjoq-2017-000096supp002.pdf]

# Outcome Measures Worksheet

An optional tool that may be useful with RCA or Aggregated Review Teams.

|                                           |                                                                                                                                                                                                                                                          |                                                                                                                                                     |                                                                                                                                                                                                                                                                              |
|-------------------------------------------|----------------------------------------------------------------------------------------------------------------------------------------------------------------------------------------------------------------------------------------------------------|-----------------------------------------------------------------------------------------------------------------------------------------------------|------------------------------------------------------------------------------------------------------------------------------------------------------------------------------------------------------------------------------------------------------------------------------|
| <b>Goal</b>                               | How will you/we know the action you are implementing will be effective in preventing this problem from happening again?                                                                                                                                  |                                                                                                                                                     |                                                                                                                                                                                                                                                                              |
| <b>Discussion</b>                         | What will be evaluated?                                                                                                                                                                                                                                  |                                                                                                                                                     |                                                                                                                                                                                                                                                                              |
|                                           | Is there any existing data you can use for historical comparison (i.e., before/after)?                                                                                                                                                                   |                                                                                                                                                     |                                                                                                                                                                                                                                                                              |
| <b>Frequency of what will be measured</b> | How frequently?                                                                                                                                                                                                                                          | How many, or for what period of time will this be measured?                                                                                         | How will this be done?                                                                                                                                                                                                                                                       |
|                                           | <input type="radio"/> Per Hour/s<br><input type="radio"/> Per shift<br><input type="radio"/> Per 24 hours<br><input type="radio"/> Per week<br><input type="radio"/> Per month<br><input type="radio"/> Per quarter<br><input type="radio"/> Other _____ | <input type="radio"/> Days _____<br><input type="radio"/> Months _____<br><input type="radio"/> Quarters _____<br><input type="radio"/> Other _____ | <input type="radio"/> Observed<br><input type="radio"/> Chart reviews<br><input type="radio"/> Tests<br><input type="radio"/> Reported incidents<br><input type="radio"/> Records review<br>_____<br><input type="radio"/> Survey _____<br><input type="radio"/> Other _____ |
| <b>Timeframe</b>                          | How long will this be measured?                                                                                                                                                                                                                          | <input type="radio"/> Days _____<br><input type="radio"/> Months _____<br><input type="radio"/> Quarters _____<br><input type="radio"/> Other _____ | Will the measuring process be repeated?                                                                                                                                                                                                                                      |
|                                           |                                                                                                                                                                                                                                                          |                                                                                                                                                     | If yes, how/when?                                                                                                                                                                                                                                                            |
| <b>Numerator</b>                          | The specific number of cases/situations you anticipate have been changed/impacted by your action (number of successful outcomes measured during timeframe).                                                                                              |                                                                                                                                                     |                                                                                                                                                                                                                                                                              |
| <b>Denominator</b>                        | The total number of cases/situations that will be included (total number of outcomes measured during timeframe).                                                                                                                                         |                                                                                                                                                     |                                                                                                                                                                                                                                                                              |
| <b>Threshold</b>                          | What percentage of compliance is expected? What percentage of successful outcomes will constitute the action as successful? (e.g.: 80%; 85%, 90%; 95%; 100%, etc.).                                                                                      |                                                                                                                                                     |                                                                                                                                                                                                                                                                              |
| <b>Reporting results</b>                  | The results will be reported to:                                                                                                                                                                                                                         | The results will be reported how often or when (by a specific date):                                                                                |                                                                                                                                                                                                                                                                              |
|                                           |                                                                                                                                                                                                                                                          |                                                                                                                                                     |                                                                                                                                                                                                                                                                              |

Here's a sample outcome measure taken from the "Program Analyst Tips for Writing Root Causes, Actions and Outcome Measures" in the RCA Toolbox.

(<http://vaww.ncps.med.va.gov/Tools/RCAToolbox/index.html>)

An observer will monitor the effectiveness of the teaching program to see if all steps are being followed by the interdisciplinary team.

Numerator (N) = number of observations in which adherence to the practice and policy occur.

Denominator (D) = random number of observations to be defined by the service line based upon volume of orthopedic patients. Threshold: 100%;

Timeframe: monthly for a period of 3 consecutive months.
